# Supplementary material
Source: HighWire-hosted journal article supplement (https://bmjopen.bmj.com/content/12/5/e054989)
Supplement: inline-supplementary-material-2 [file inline-supplementary-material-2.pdf]

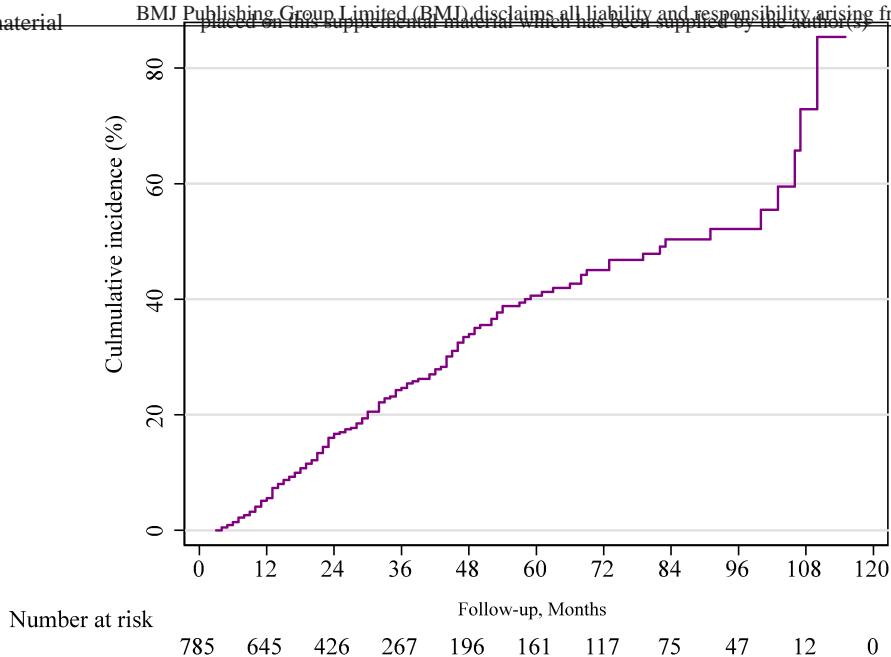

Figure S2 The cumulative incidence rate of endpoint events among patients with CKD stages 3-5 in the whole Cohort.
