# Supplementary material
Source: HighWire-hosted journal article supplement (https://bmjopen.bmj.com/content/12/5/e054989)
Supplement: inline-supplementary-material-5 [file inline-supplementary-material-5.pdf]

**Table S1** Collinear analysis of potential risk factors.

| <b>Variables</b>       | <b>Tolerance</b> | <b>VIF</b> |
|------------------------|------------------|------------|
| CDM adherence          | 0.926            | 1.08       |
| Age                    | 0.78             | 1.282      |
| Hb                     | 0.716            | 1.397      |
| Scr                    | 0.182            | 5.489      |
| eGFR                   | 0.151            | 6.618      |
| Urea                   | 0.697            | 1.435      |
| CKD Stage              | 0.141            | 7.093      |
| UA                     | 0.927            | 1.079      |
| CO <sub>2</sub> CP     | 0.815            | 1.227      |
| BLD                    | 0.85             | 1.177      |
| PRO                    | 0.706            | 1.417      |
| Primary disease        | 0.81             | 1.234      |
| Hypertension           | 0.573            | 1.745      |
| Cardiovascular disease | 0.867            | 1.154      |
| Diuretics              | 0.847            | 1.181      |
| ACEI/ARB               | 0.784            | 1.275      |
| CCB                    | 0.564            | 1.773      |
| Alpha-blockers         | 0.813            | 1.23       |
| Beta-blockers          | 0.763            | 1.311      |
| Sodium bicarbonate     | 0.819            | 1.221      |

|                                                   |       |       |
|---------------------------------------------------|-------|-------|
| EPO                                               | 0.563 | 1.777 |
| Polysaccharide-Iron Complex                       | 0.565 | 1.768 |
| Folic acid                                        | 0.705 | 1.418 |
| Compound $\alpha$ -ketoacid Tablets               | 0.851 | 1.175 |
| Calcium supplement                                | 0.886 | 1.128 |
| Chinese herbal decoction                          | 0.98  | 1.021 |
| Chinese patent medicines for dispelling turbidity | 0.781 | 1.281 |

Abbreviations: CDM: chronic disease management; Hb: hemoglobin; Scr: serum creatinine; eGFR: estimated glomerular filtration rate; UA: serum uric acid; CO<sub>2</sub>CP: carbon dioxide combining power; BLD: urine latent blood; PRO: urine protein; ACEI: angiotensin converting enzyme inhibitor; ARB: angiotensin receptor blockers; CCB: calcium channel entry blockers; EPO: erythropoietin

**Table S2** Models' net reclassification improvement and integrated discrimination improvement

|                     | Year | NRI (95% CI)            | IDI (95% CI)            | P Value |
|---------------------|------|-------------------------|-------------------------|---------|
| Model B vs. Model E | 1    | -0.359 (-0.683, 0.037)  | -0.071 (-0.128, -0.021) | <0.001  |
|                     | 2    | -0.332 (-0.568, -0.035) | -0.067 (-0.110, -0.014) | <0.001  |
