# Supplementary material
Source: HighWire-hosted journal article supplement (https://bmjopen.bmj.com/content/12/5/e054989)
Supplement: inline-supplementary-material-9 [file inline-supplementary-material-9.pdf]

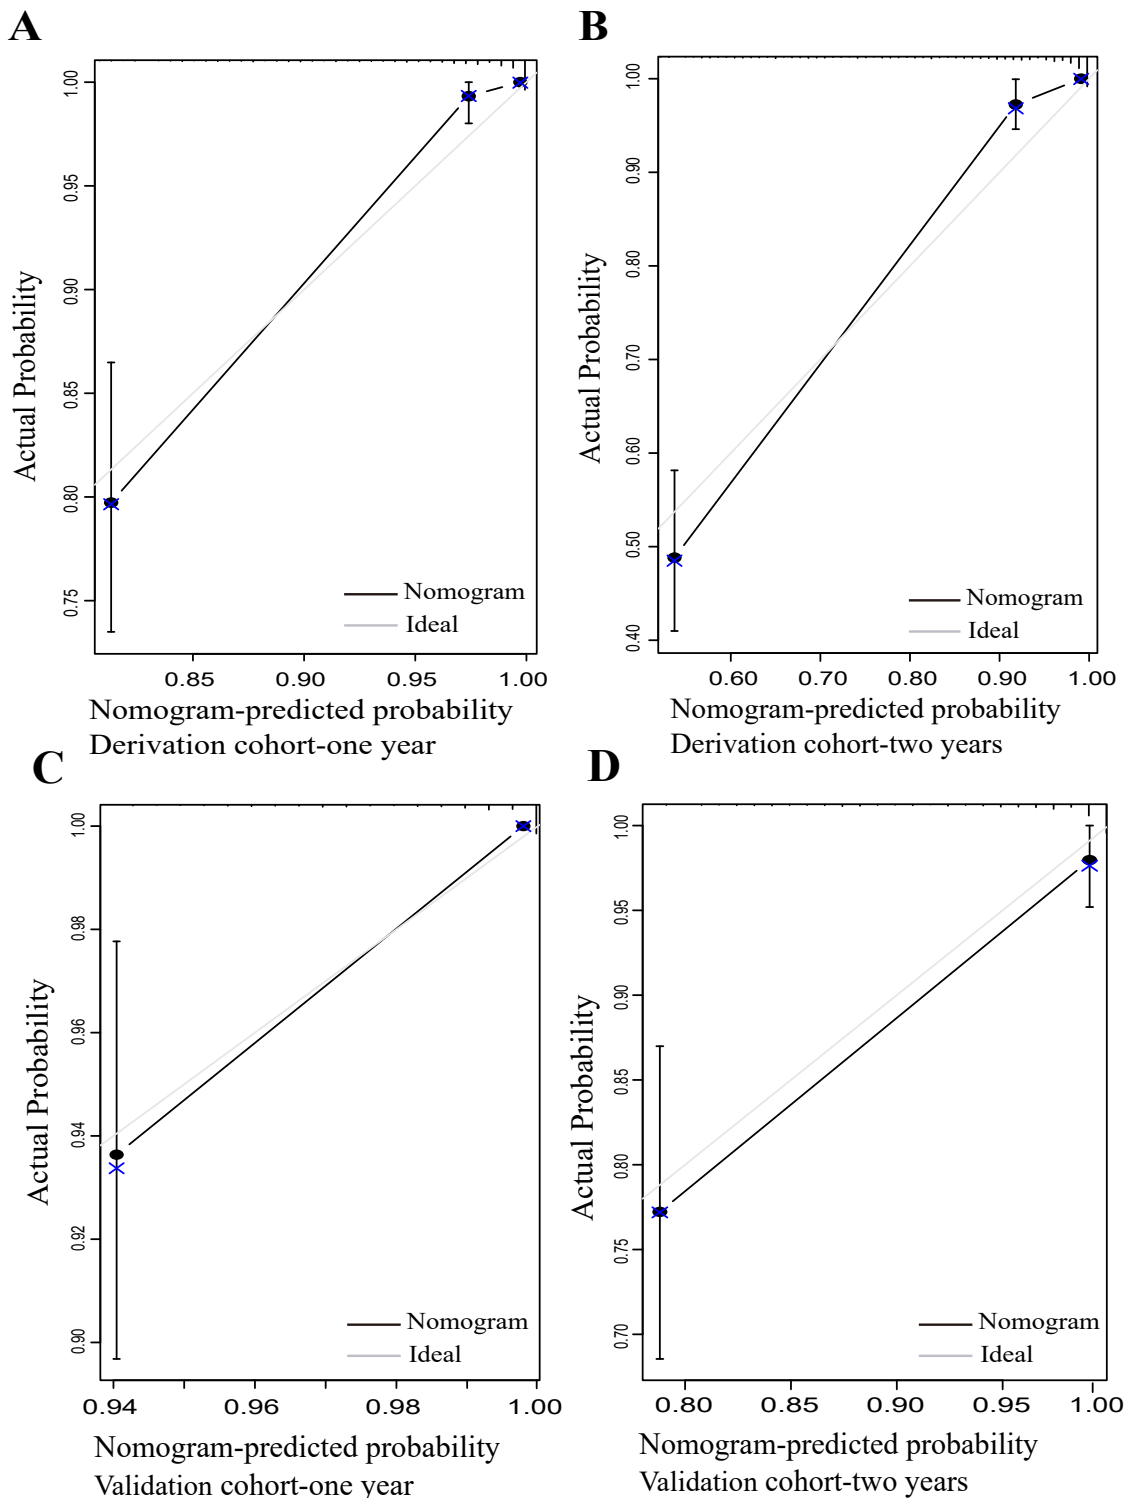

Figure S8 Calibration curves for Model E

(A) Derivation cohort, 1 year, (B) Derivation cohort, 2 years, (C) Validation cohort, 1 year, (D) Validation cohort, 2 years
