# Supplementary material
Source: HighWire-hosted journal article supplement (https://bmjopen.bmj.com/content/12/5/e054989)
Supplement: inline-supplementary-material-10 [file inline-supplementary-material-10.pdf]

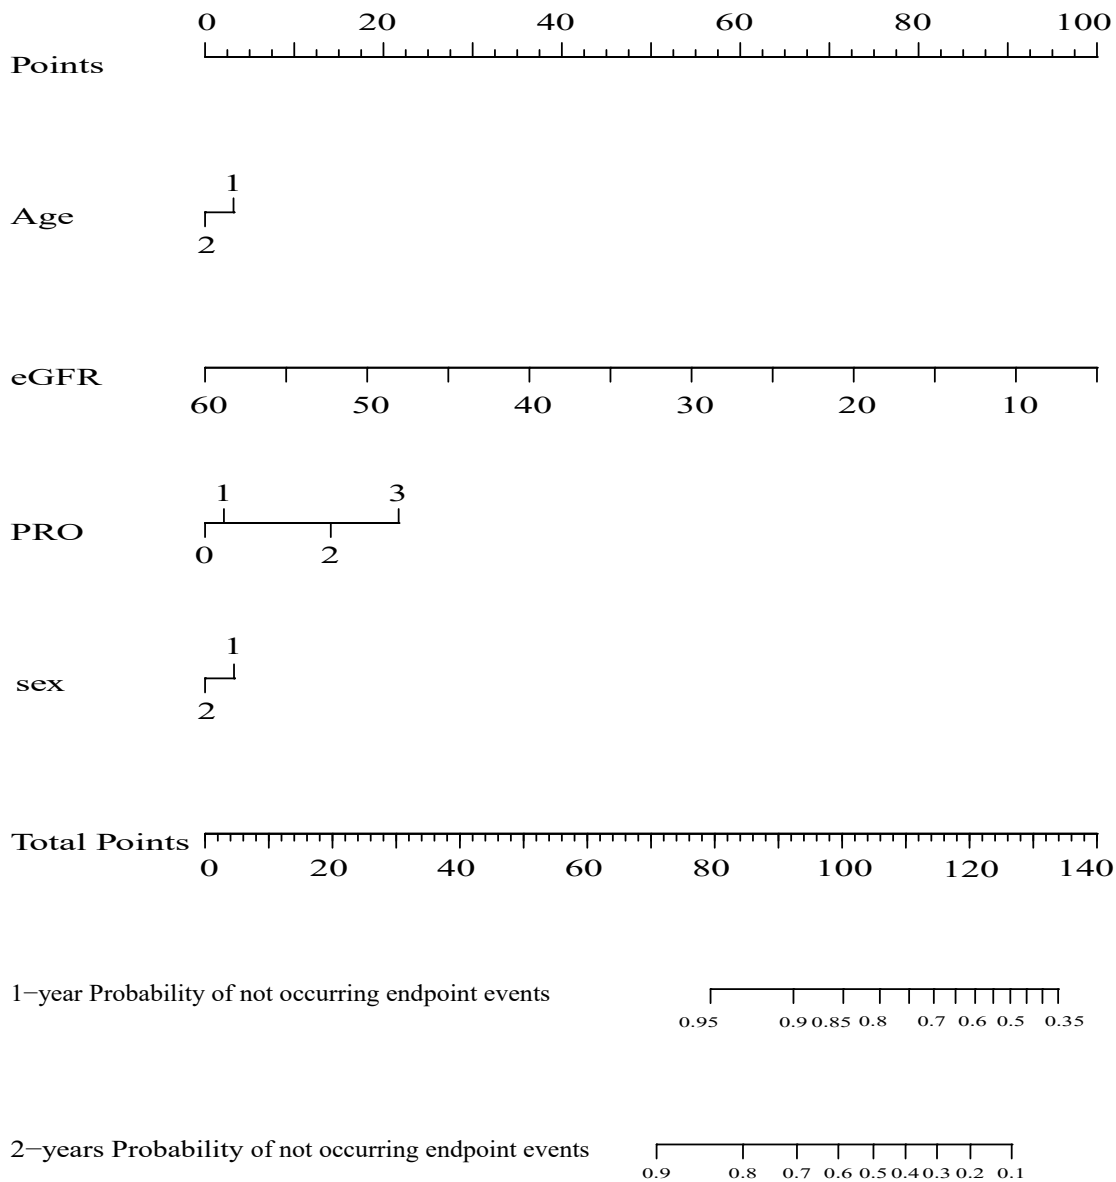

Figure S9 Nomogram for Model E

eGFR: estimated glomerular; PRO: urine protein.

Instructions: locate age on the corresponding axis. Draw a line straight down to the axis to calculate how many points toward the probability of not occurring endpoint events in the patients at different ages. Repeat the courses for eGFR, PRO, sex. Add all points obtained from the previous steps, and locate the final summation on the total score axis. The probability of not occurring endpoint events corresponds to the summation score on the risk scale.
